# Supplementary material for: Synthesis of Bz-TTFs with polymerization sites and the properties of Li-ion batteries comprising them as active materials
Source: Royal Society of Chemistry journal article supplement (doi:10.1039/d3nj00289f), 2023-01-01
Supplement: d3nj00289f1.pdf [file d3nj00289f1.pdf]

## ***Supporting Information***

### **Synthesis of Bz-TTFs with Polymerization Sites and Properties of Li-ion Batteries Comprising them as Active Materials**

Aya Yoshimura,<sup>a</sup> Moeko Yoshinouchi,<sup>a</sup> Keisuke Hemmi,<sup>a</sup> Yuto Aso,<sup>a</sup> Ryosuke Utsumi,<sup>a</sup> Takashi Shirahata,<sup>a,b</sup> Masaru Yao,<sup>c</sup> and Yohji Misaki\*<sup>a,b</sup>

<sup>a</sup> *Department of Applied Chemistry, Graduate School of Science and Engineering, Ehime University 3 Bunkyo-cho, Matsuyama 790-8577 (Japan)*

<sup>b</sup> *Research Unit for Development of Organic Superconductors, Ehime University 2-5 Bunkyo-cho, Matsuyama 790-8577 (Japan)*

<sup>c</sup> *Research Institute of Electrochemical Energy, National Institute of Advanced Industrial Science and Technology (AIST), 1-8-31 Midorigaoka, Ikeda, Osaka 563-8577 (Japan)*

## Table of Contents

|    |                                                           |     |
|----|-----------------------------------------------------------|-----|
| 1  | General Comments                                          | S3  |
| 2  | Experimental procedures                                   | S4  |
| 3  | Spectral data of the products                             | S5  |
| 4  | X-ray crystal structure analysis                          | S6  |
| 5  | Powder XRD patterns                                       | S11 |
| 6  | Cyclic voltammograms                                      | S12 |
| 7  | Charge-discharge properties                               | S13 |
| 8  | The proposed redox and polymerization process of <b>1</b> | S15 |
| 9  | Confirmation of polymerization                            | S16 |
| 10 | NMR spectra                                               | S18 |
| 11 | References                                                | S20 |

## General Comments

All manipulations were performed under an argon atmosphere and all reagents were purchased from commercial suppliers and used without further purification.  $^1\text{H}$  and  $^{13}\text{C}$  NMR spectra were recorded on a Bruker Biospin AVANCE 400 or Bruker Biospin AVANCE III 500 spectrometer equipped with a CryoProbe (400 MHz for  $^1\text{H}$  and 126 MHz for  $^{13}\text{C}$ ) using Acetone- $d_6$ - $\text{CS}_2$  or  $\text{C}_6\text{D}_6$ - $\text{CS}_2$  solvent. The chemical shifts were referenced to tetramethylsilane for  $^1\text{H}$  and  $^{13}\text{C}$  NMR or the solvent resonances for  $^{13}\text{C}$  NMR as internal standards ( $\text{C}_6\text{D}_6$ : 128.060 ppm). The high-resolution mass spectra were recorded on Thermo Scientific, Exactive Plus Orbitrap Mass Spectrometer for electrospray ionization (ESI). Melting points were determined with a Yanaco MP-500D. IR spectra were recorded on a JASCO FT/IR-460 plus spectrometer. The elemental analyses were determined by MICRO CORDER JM10T.

The diffraction data of **1** and **2** were collected on a Rigaku VariMaxSaturn724 CCD system at the Advanced Research Support Center, Ehime University using multi-layer mirror monochromated Mo- $K\alpha$  radiation. Raw frame data were integrated using CrysAlisPro<sup>[1]</sup> and the data were corrected for Lorentz and polarization effects. The crystal structures were solved by the dual-space method (SHELXT-2018/2)<sup>2</sup> and refined by full-matrix least squares on  $F^2$  (SHELXL-2018/3).<sup>[2,3]</sup>

The powder X-ray diffraction (XRD) patterns were collected on a Rigaku MiniFlex II diffractionmeter using  $\text{Cu}K\alpha$  radiation.

Cyclic voltammeteries (CV) were recorded on ALS/chi 617B Electrochemical analyzer. The CV cell consisted of Pt working electrode, Pt wire counter electrode, and an  $\text{Ag}/\text{AgNO}_3$  reference electrode. The measurements were carried out in benzonitrile and carbon disulfide-benzonitrile solution (1:1, v/v) with a concentrate 0.1 M  $^n\text{Bu}_4\text{N}^+\text{PF}_6^-$  as a supporting electrolyte with a scan rate of 50  $\text{mV s}^{-1}$  at 25 °C. All redox potentials were measured against  $\text{Ag}/\text{Ag}^+$  and converted to vs.  $\text{Fc}/\text{Fc}^+$ , where Fc denotes ferrocene.

The cell performance was examined using the R2032 type cell composed of a positive electrode incorporating **1** and **2**, and a negative electrode using a lithium metal sheet. The positive electrode was prepared by mixing of active material, acetylene black as the conductive additive, and poly(tetrafluoroethylene) as the binder. The weight ratio of these components was 1:8:1. The composite was pressed onto an Al mesh current collector to form the electrode. The amount of the active material per electrode was ca. 2 mg in coin-type R2032. The area loading of the active material was ca. 1.7  $\text{mg}/\text{cm}^2$ . A mixed solution of ethylene carbonate and diethyl carbonate (1:5, v/v) containing 1.0 M  $\text{LiPF}_6$  was used as an electrolyte solution. A coin cell was fabricated by sandwiching a glass filter separator containing the electrolyte solution with the positive electrode and a metallic Li negative electrode under a low dew point ( $<-70^\circ\text{C}$ ) condition. The cell was charged up to 4.3 V with a current density of 40  $\text{mA g}^{-1}$  and then discharged to 2.5 V with a current density of 100  $\text{mA g}^{-1}$  at 30 °C.

## Experimental procedures

### Synthesis of compound 1 and 2

Compound **1**; Pd(OAc)<sub>2</sub> (21.2 mg, 0.094 mmol), PtBu<sub>3</sub>•HBF<sub>4</sub> (63.7 mg, 0.22 mmol), and Cs<sub>2</sub>CO<sub>3</sub> (212.2 mg, 0.90 mmol) were placed in a 30-mL reaction flask under an argon atmosphere. 1,4-dioxane (10 mL) was added and the mixture was stirred for 10 min at 50 °C. Bz-TTF (51.2 mg, 0.20 mmol) and 4-bromotriphenylamine (194.8 mg, 0.60 mmol) were then added. The mixture was heated at 110 °C for 72 h, and then, the solvent was evaporated in vacuo. The residue was column chromatographed on silica gel by CS<sub>2</sub> and reprecipitated from CS<sub>2</sub>/hexane (1:15) to give **1** (118.0 mg, 0.16 mmol) as an orange powder in 80% yield. Compound **2**; Pd(OAc)<sub>2</sub> (20.3 mg, 0.090 mmol), PtBu<sub>3</sub>•HBF<sub>4</sub> (78.5 mg, 0.27 mmol), and Cs<sub>2</sub>CO<sub>3</sub> (294.5 mg, 0.65 mmol) were placed in a 30-mL reaction flask under an argon atmosphere. 1,4-dioxane (4 mL) was added and the mixture was stirred for 10 min at 50 °C. Bz-TTF (40.7 mg, 0.16 mmol) and 4-bromo-*N*-methyl-*N*-phenylbenzenamine<sup>[4]</sup> (126.1 mg, 0.48 mmol) were then added. The mixture was heated at 110 °C for 3 days, and then, the solvent was evaporated in vacuo. The residue was column chromatographed on silica gel by CS<sub>2</sub> and reprecipitated from CS<sub>2</sub>/hexane (1:15) to give **2** (81.0 mg, 0.13 mmol) as an orange powder in 82% yield.

## Spectral data of the products

1

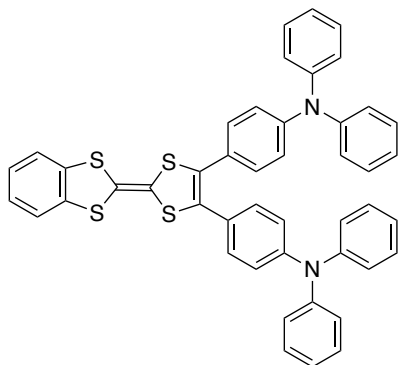

Yield: 80%; Orange powder; m.p. 248–249 °C (decomposed);  $R_f = 0.28$  ( $\text{CS}_2$ );  $^1\text{H NMR}$  (acetone- $d_6$ : $\text{CS}_2 = 10:1$ , 400 MHz, 23 °C, TMS)  $\delta$  6.86 (d,  $J = 8.8$  Hz, 4H), 6.97–7.10 (m, 18H), 7.18–7.23 (m, 10H);  $^{13}\text{C NMR}$  ( $\text{C}_6\text{D}_6$ : $\text{CS}_2 = 10:1$ , 128 MHz, 24 °C, TMS)  $\delta$  107.2, 111.8, 122.0, 122.4, 123.9, 125.3, 125.9, 126.2, 127.9, 129.8, 130.3, 137.8, 147.2, 147.8; IR (KBr) 3057, 3029, 1587, 1486, 1444, 1434, 1330, 1314, 1276, 753, 739, 694  $\text{cm}^{-1}$ ; HRMS (ESI): calcd. for  $\text{C}_{46}\text{H}_{32}\text{N}_2\text{S}_4$   $[\text{M}]^+$ : 740.1448; found: 740.1443.

2

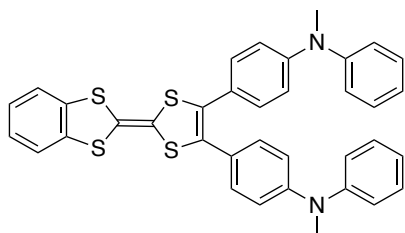

Yield: 82%; Yellow powder; m.p. 189–190 °C;  $R_f = 0.28$  ( $\text{CS}_2$ );  $^1\text{H NMR}$  (acetone- $d_6$ : $\text{CS}_2 = 10:1$ , 400 MHz, 23 °C, TMS)  $\delta$  3.31 (s, 6H), 6.76 (d,  $J = 8.8$  Hz, 4H), 7.01–7.17 (m, 12H), 7.29–7.35 (m, 6H);  $^{13}\text{C NMR}$  ( $\text{C}_6\text{D}_6$ : $\text{CS}_2 = 10:1$ , 128 MHz, 24 °C, TMS)  $\delta$  40.1, 106.4, 112.4, 117.1, 122.0, 123.9, 123.9, 125.9, 127.5, 128.4, 129.8, 130.3, 137.9, 148.2, 148.6; IR (KBr) 3031, 2871, 2811, 1606, 1588, 1508, 1492, 1340, 1254, 1191, 1178, 1119, 742, 698  $\text{cm}^{-1}$ ; HRMS (ESI): calcd. for  $\text{C}_{36}\text{H}_{28}\text{N}_2\text{S}_4$   $[\text{M}]^+$ : 616.1135; found: 616.1130; elemental analysis calcd. (%) for  $\text{C}_{36}\text{H}_{28}\text{N}_2\text{S}_4$ : C, 70.09; H, 4.58; N, 4.54, found: C, 69.80; H, 4.63; N, 4.50.

## X-ray crystal structure analysis

**Table S1.** Crystal data of **1** and **2**.

|                                                           | <b>1</b>                                                      | <b>2</b>                                                      |
|-----------------------------------------------------------|---------------------------------------------------------------|---------------------------------------------------------------|
| formula                                                   | C <sub>46</sub> H <sub>32</sub> N <sub>2</sub> S <sub>4</sub> | C <sub>36</sub> H <sub>28</sub> N <sub>2</sub> S <sub>4</sub> |
| <i>T</i> [K]                                              | 100                                                           | 100                                                           |
| crystal system                                            | triclinic                                                     | monoclinic                                                    |
| space group                                               | <i>P</i> -1 (#2)                                              | <i>P</i> 2 <sub>1</sub> / <i>c</i> (#14)                      |
| <i>a</i> [Å]                                              | 7.3839(2)                                                     | 12.8261(4)                                                    |
| <i>b</i> [Å]                                              | 11.7705(3)                                                    | 17.1559(5)                                                    |
| <i>c</i> [Å]                                              | 22.5226(6)                                                    | 13.9852(4)                                                    |
| $\alpha$ [°]                                              | 79.201(2)                                                     | 90.0000                                                       |
| $\beta$ [°]                                               | 82.931(2)                                                     | 105.543(3)                                                    |
| $\gamma$ [°]                                              | 73.379(2)                                                     | 90.0000                                                       |
| <i>V</i> [Å <sup>3</sup> ]                                | 1837.46(9)                                                    | 2964.81(16)                                                   |
| <i>Z</i>                                                  | 2                                                             | 4                                                             |
| <i>D</i> <sub>calc</sub> [g cm <sup>-3</sup> ]            | 1.339                                                         | 1.382                                                         |
| $\mu$ [mm <sup>-1</sup> ]                                 | 0.296                                                         | 0.350                                                         |
| independent reflections                                   | 10650                                                         | 8963                                                          |
| observed reflections [ <i>I</i> >2 $\sigma$ ( <i>I</i> )] | 7894                                                          | 6579                                                          |
| variable parameters                                       | 469                                                           | 379                                                           |
| <i>R</i> <sub>int</sub>                                   | 0.0538                                                        | 0.0764                                                        |
| GOF on <i>F</i> <sup>2</sup>                              | 1.046                                                         | 1.026                                                         |
| <i>R</i> 1 [ <i>I</i> >2 $\sigma$ ( <i>I</i> )]           | 0.0521                                                        | 0.0528                                                        |
| <i>wR</i> 2 [ <i>I</i> >2 $\sigma$ ( <i>I</i> )]          | 0.1102                                                        | 0.1054                                                        |
| <i>R</i> 1 (all data)                                     | 0.0770                                                        | 0.0825                                                        |
| <i>wR</i> 2 (all data)                                    | 0.1217                                                        | 0.1181                                                        |
| CCDC No.                                                  | 2223557                                                       | 2223558                                                       |

(a)

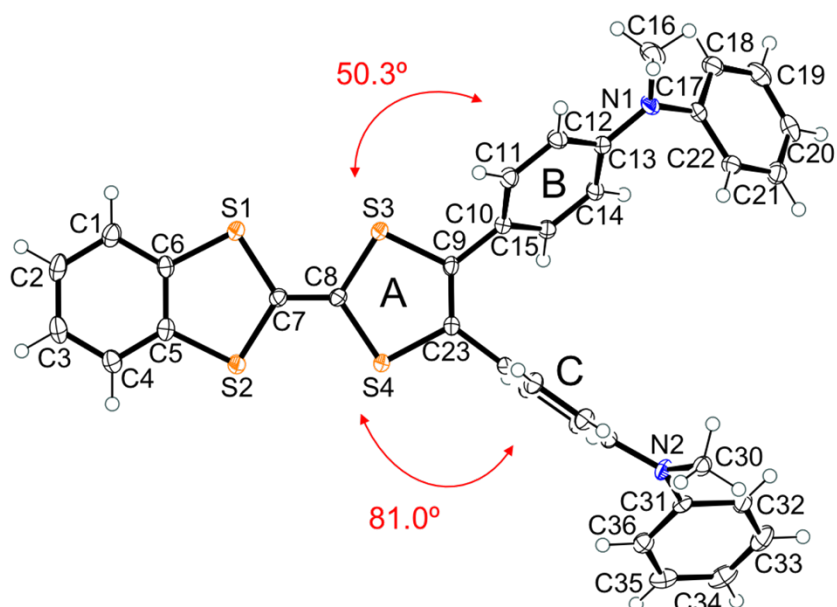

(b)

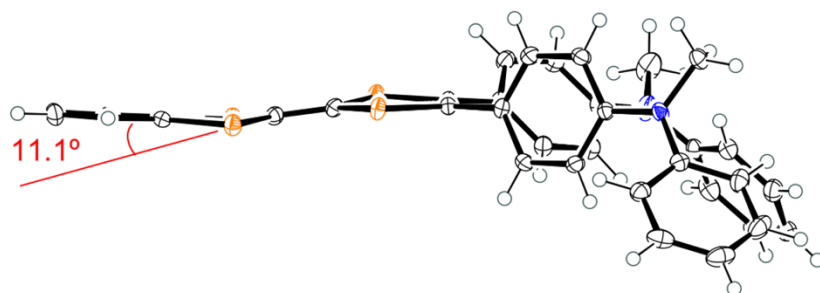

**Fig. S1** (a) Top and (b) side views of ORTEP drawings for **2**. Ellipsoids displayed at 50% probability. The two TPA moieties on the 1,3-dithiole ring were twisted from the TTF core with dihedral angles of  $50.3^\circ$  (Plane A – Plane B) and  $81.0^\circ$  (Plane A – Plane C). The folding angle of the 1,3-dithiole ring along the S1–S2 axis being  $11.1^\circ$ .

(a)

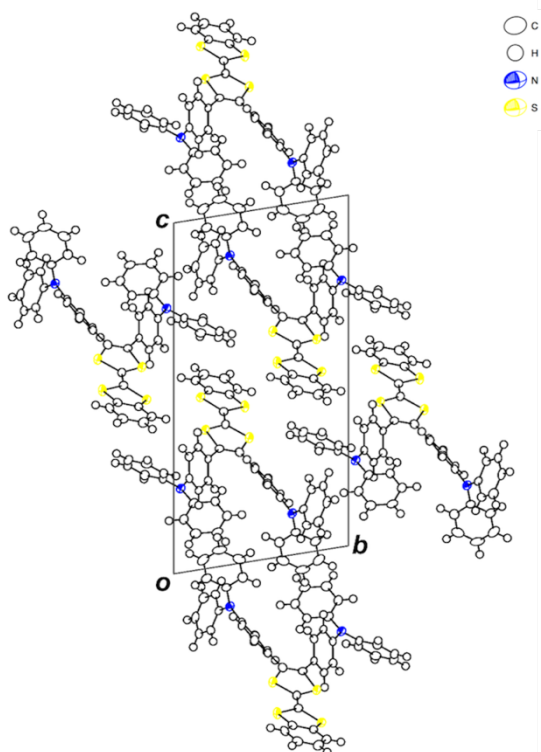

(b)

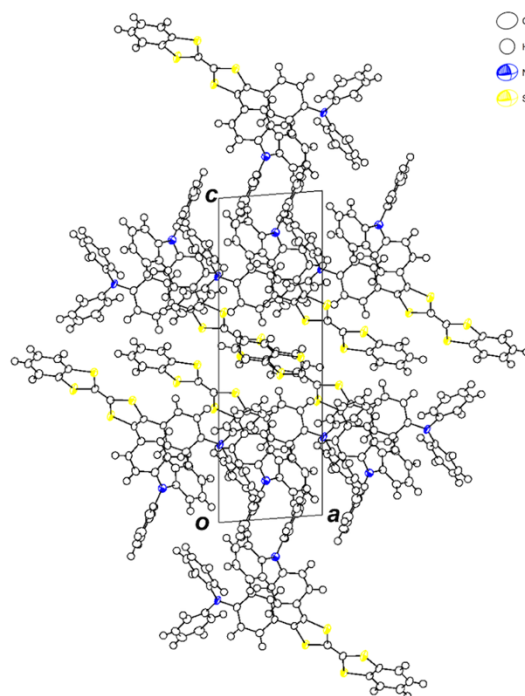

(c)

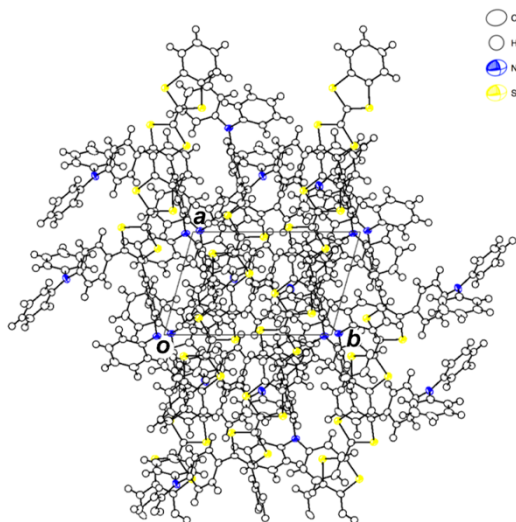

**Fig. S2** Crystal structures of 1 viewed along (a) the *a* axis, (b) the *b* axis, and (c) the *c* axis.



(a)

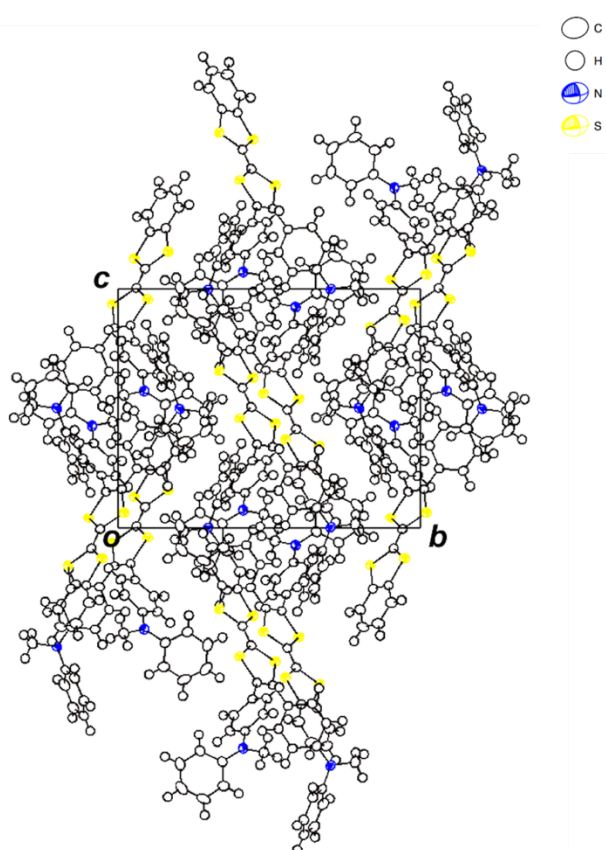

(b)

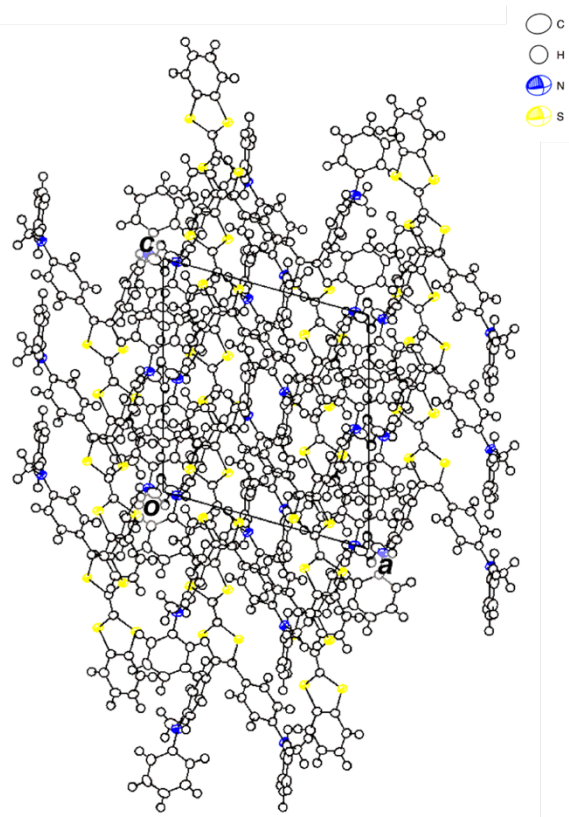

(c)

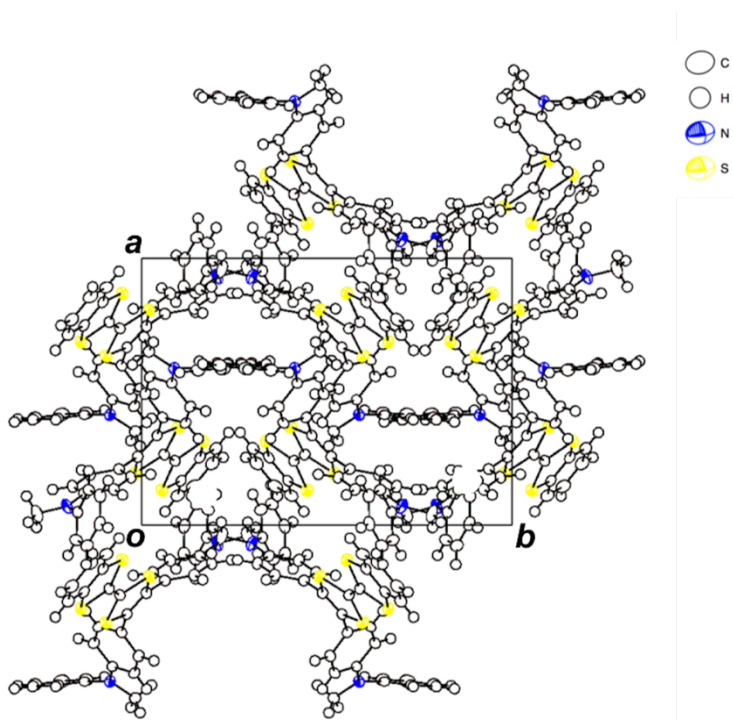

**Fig. S3** Crystal structures of **2** viewed along (a) the *a* axis, (b) the *b* axis, and (c) the *c* axis.

(a)

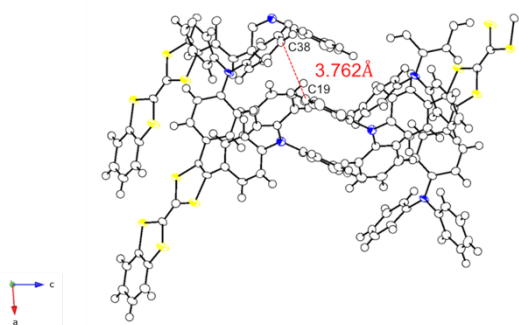

(b)

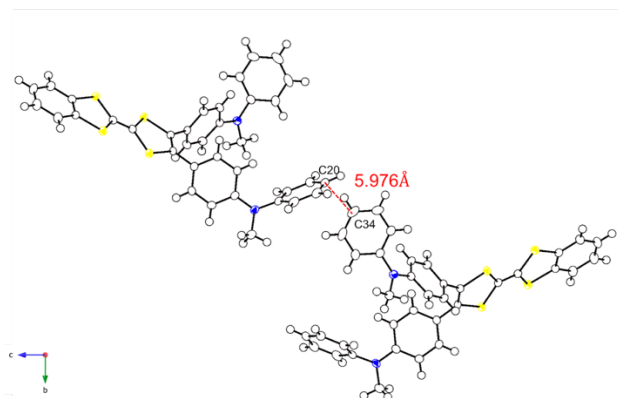

**Fig. S4** (a) Crystal structures of **1**. The red dotted lines depicted the distance of reactive sites (C38···C19 = 3.762 Å). (b) Crystal structures of **2**. The red dotted lines depicted the distance of reactive sites (C34···C20 = 5.976 Å).

## Powder XRD patterns

(a)

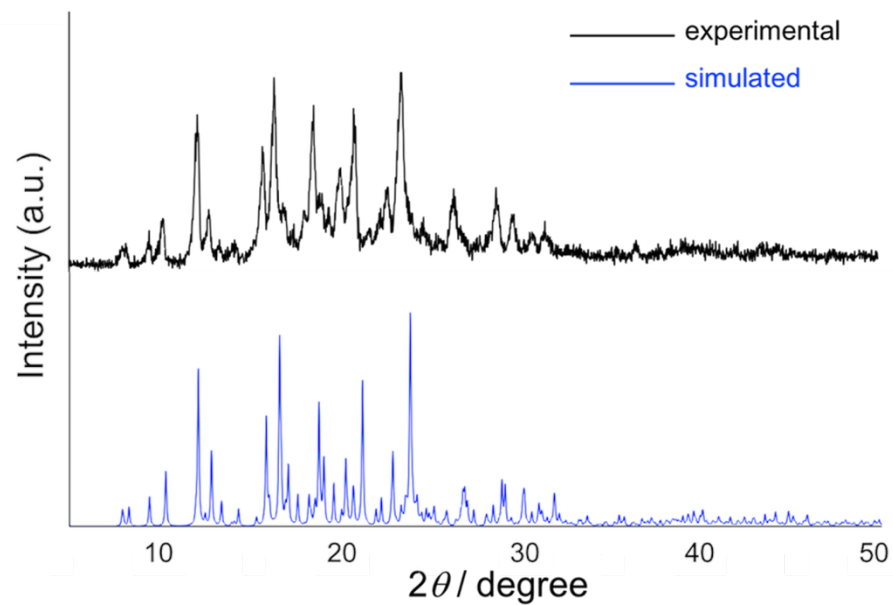

(b)

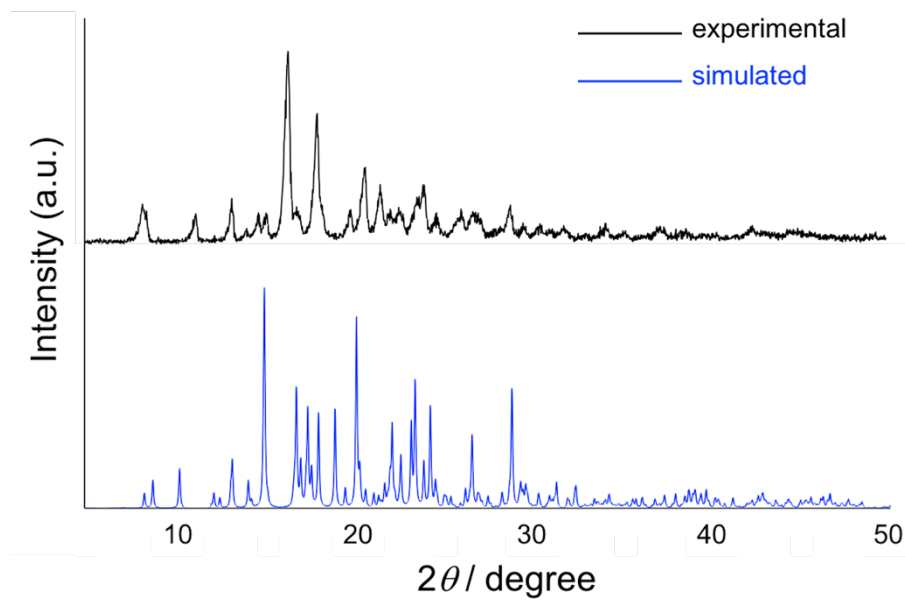

**Fig. S5** Powder XRD pattern of (a) 1 and (b) 2.

## Cyclic voltammograms

(a)

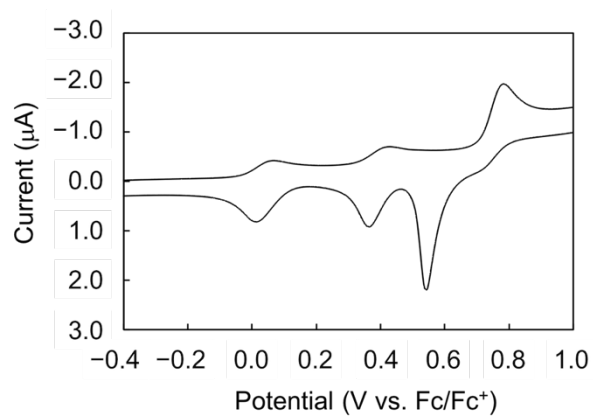

(b)

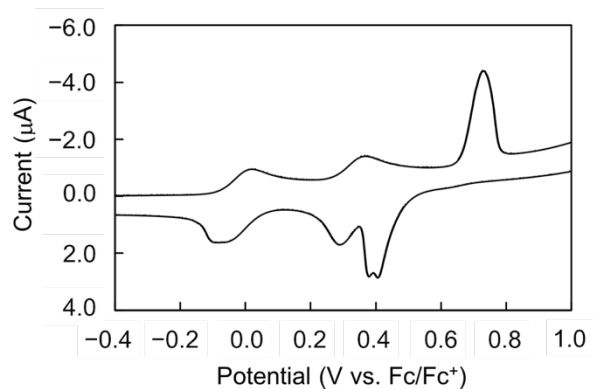

(c)

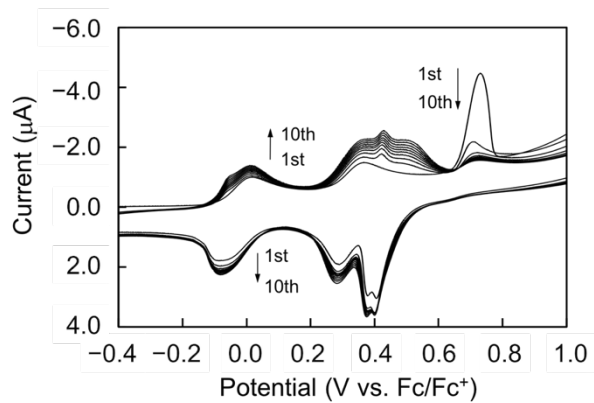

**Fig. S6** Cyclic voltammograms of (a) **1** and (b) **2** ( $3.0 \times 10^{-4}$  M) in a benzonitrile-carbon disulfide (1/1, v/v) solution containing 0.1 M *n*Bu<sub>4</sub>NPF<sub>6</sub> with the scan rate of 50 mV s<sup>-1</sup>. (c) Repeating CV cycles of **2** with the scan rate of 50 mV s<sup>-1</sup>.

## Charge–discharge properties

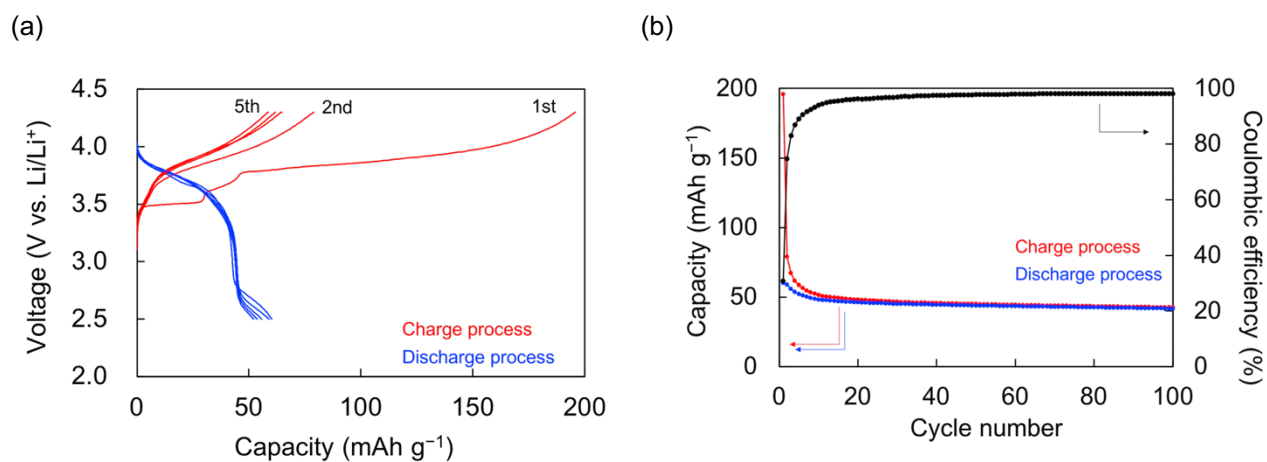

**Fig. S7** (a) Galvanostatic charge–discharge curves of the **1**/Li cell at current densities of 40 mA g<sup>-1</sup> (charge) and 100 mA g<sup>-1</sup> (discharge). (b) Cyclic trend and Coulombic efficiency in the charge–discharge capacities of the **1**/Li cell. The electrode containing 50 wt% of **1**.

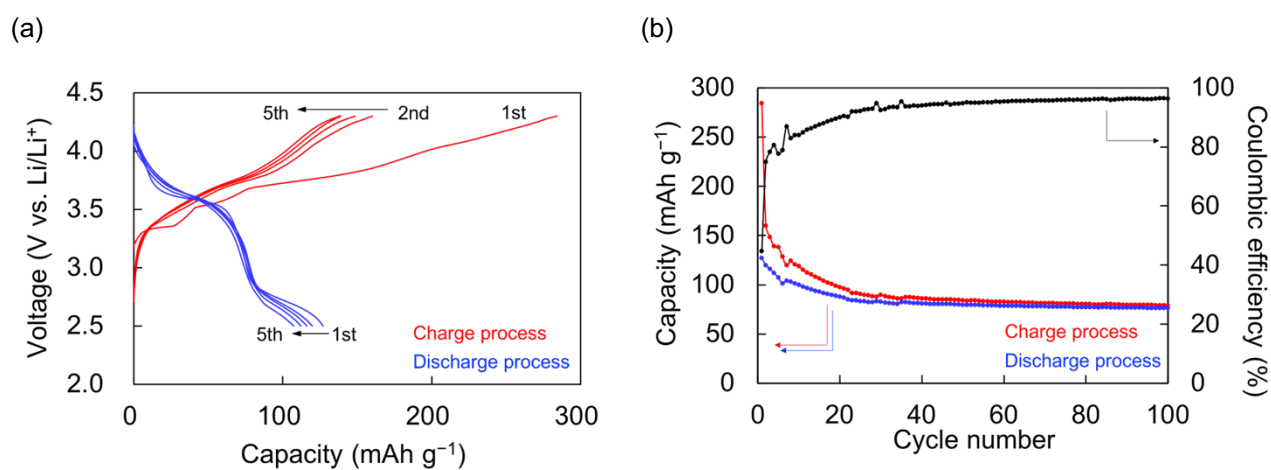

**Fig. S8** (a) Galvanostatic charge–discharge curves of the **2**/Li cell at current densities of 40 mA g<sup>-1</sup> (charge) and 100 mA g<sup>-1</sup> (discharge). (b) Cyclic trend and Coulombic efficiency in the charge–discharge capacities of the **2**/Li cell.

**Table S2.** Charge–discharge parameters for the rechargeable batteries using **1** and **2**.

| Compounds                                                                      | <b>1</b> | <b>1</b> | <b>2</b> |
|--------------------------------------------------------------------------------|----------|----------|----------|
| The content of an active materials in a positive electrode (wt%)               | 10       | 50       | 10       |
| 1st Discharge capacity (mAh g <sup>-1</sup> )                                  | 132      | 60       | 127      |
| Theoretical capacity for six-electron redox reaction (mAh g <sup>-1</sup> )    | 147      | 147      | 174      |
| The average voltage for the first discharge (V (vs. Li/Li <sup>+</sup> ))      | 3.37     | 3.38     | 3.24     |
| The energy density for the first discharge (mWh g <sup>-1</sup> ) <sup>a</sup> | 445      | 203      | 411      |

<sup>a</sup>The energy density is translated by the product of the capacity and the voltage.

## The proposed redox and polymerization process of 1

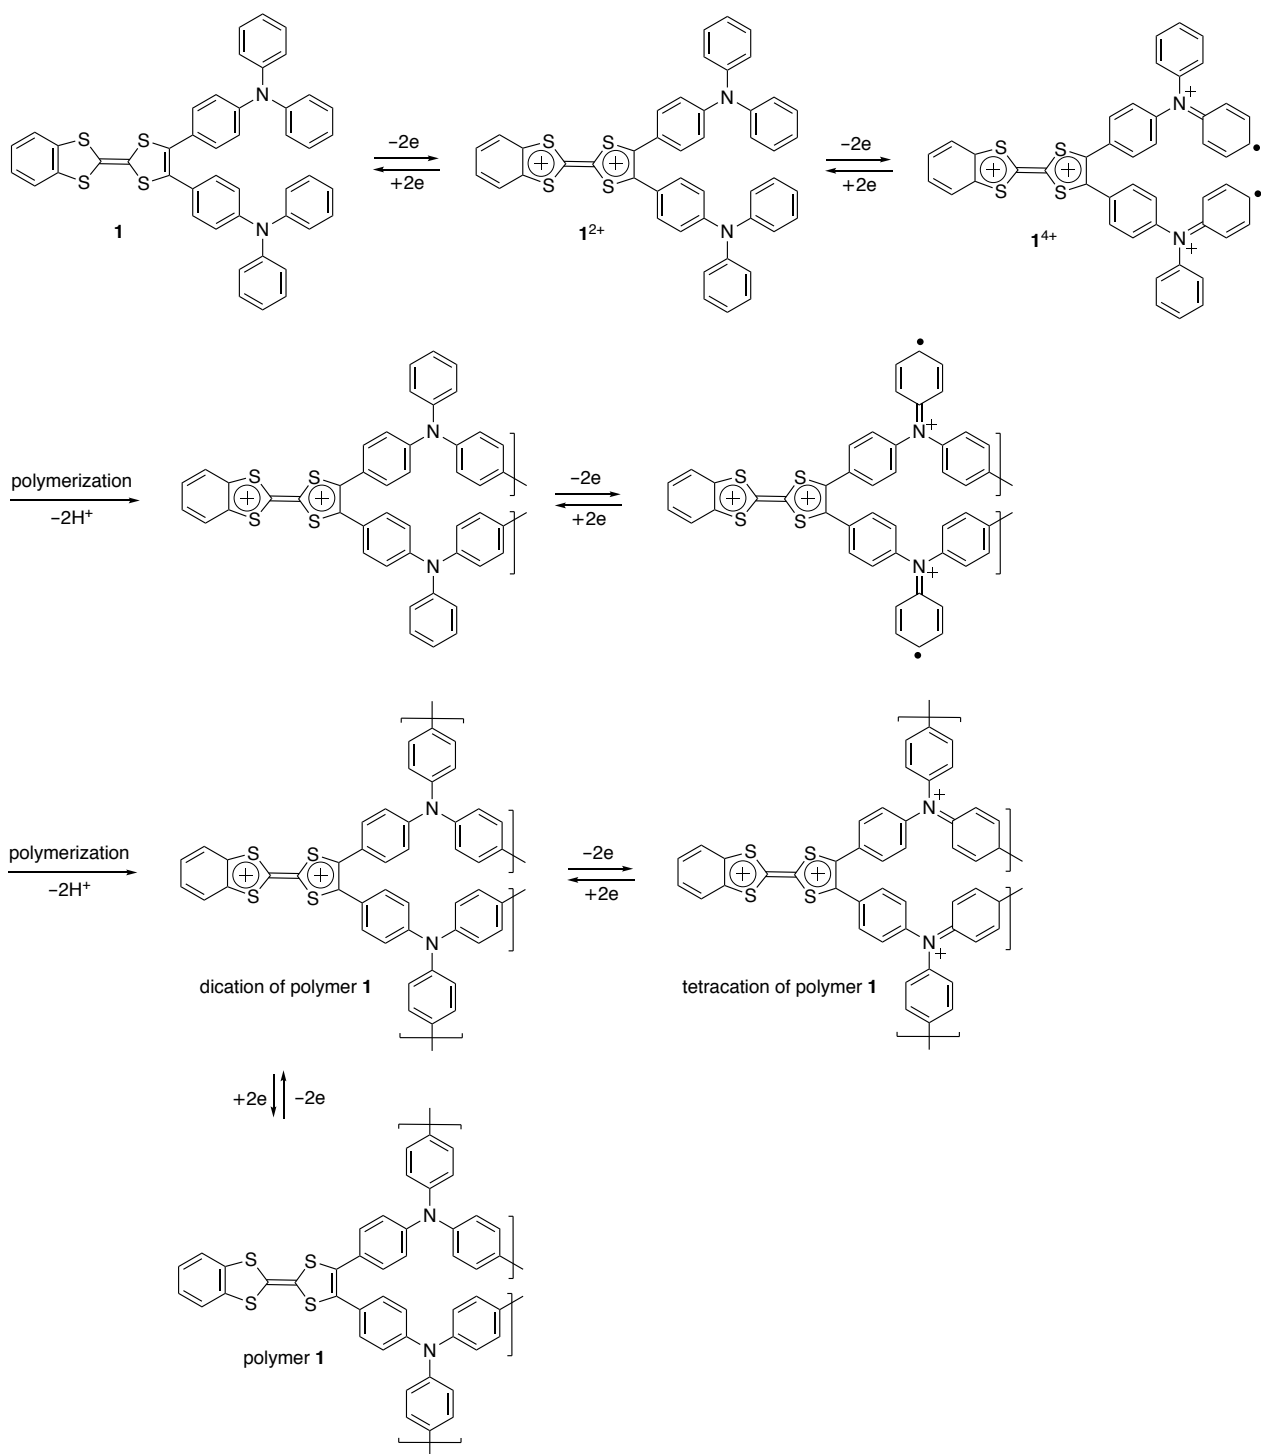

**Scheme S1.** The proposed redox and polymerization process of 1.

## Confirmation of polymerization

(a)

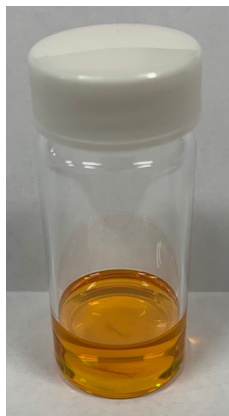

(b)

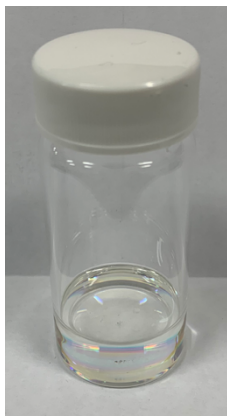

**Fig. S9** Photos of (a) the orange solution obtained by washing the cell electrodes *before* charge-discharge processes using the 5 mL of carbon disulphide and (b) the colorless solution obtained by washing the cell electrodes *after* charge-discharge processes. The 5 mL of carbon disulfide was used for the washing.



(a)

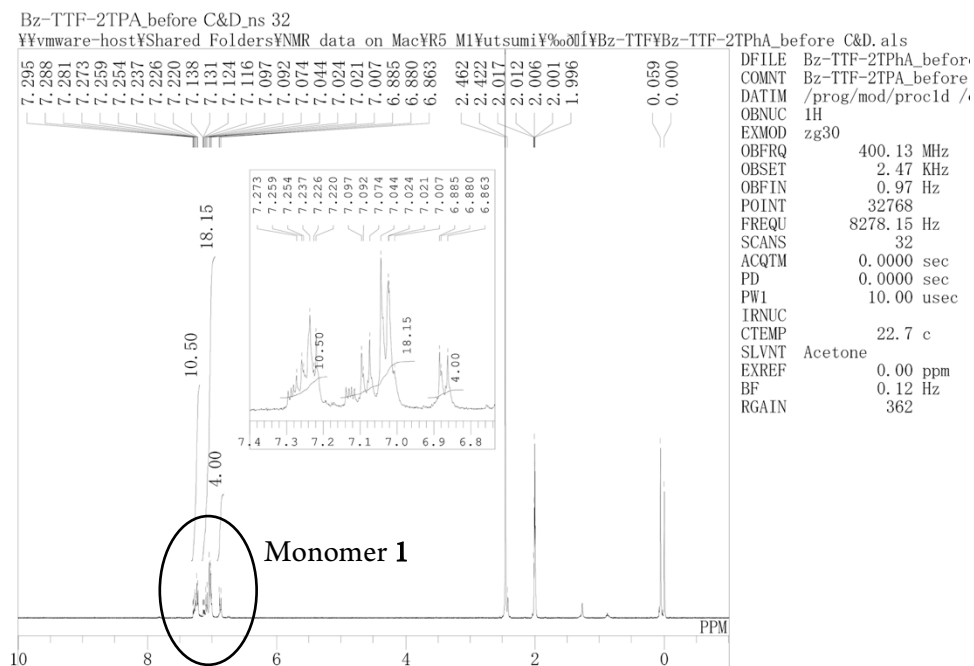

(b)

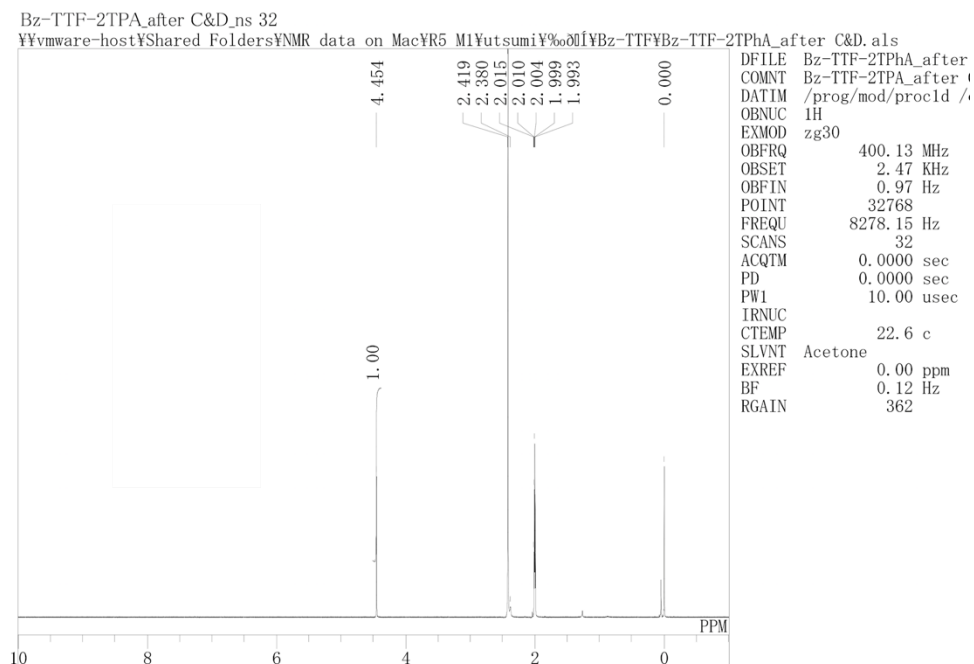

**Fig. S10**  $^1\text{H}$  NMR spectra of (a) residue from the orange solution (Fig. S9a) and (b) residue from the colorless solution (Fig. S9b) after evaporation of carbon disulfide.

# NMR spectra

## 1 (<sup>1</sup>H NMR)

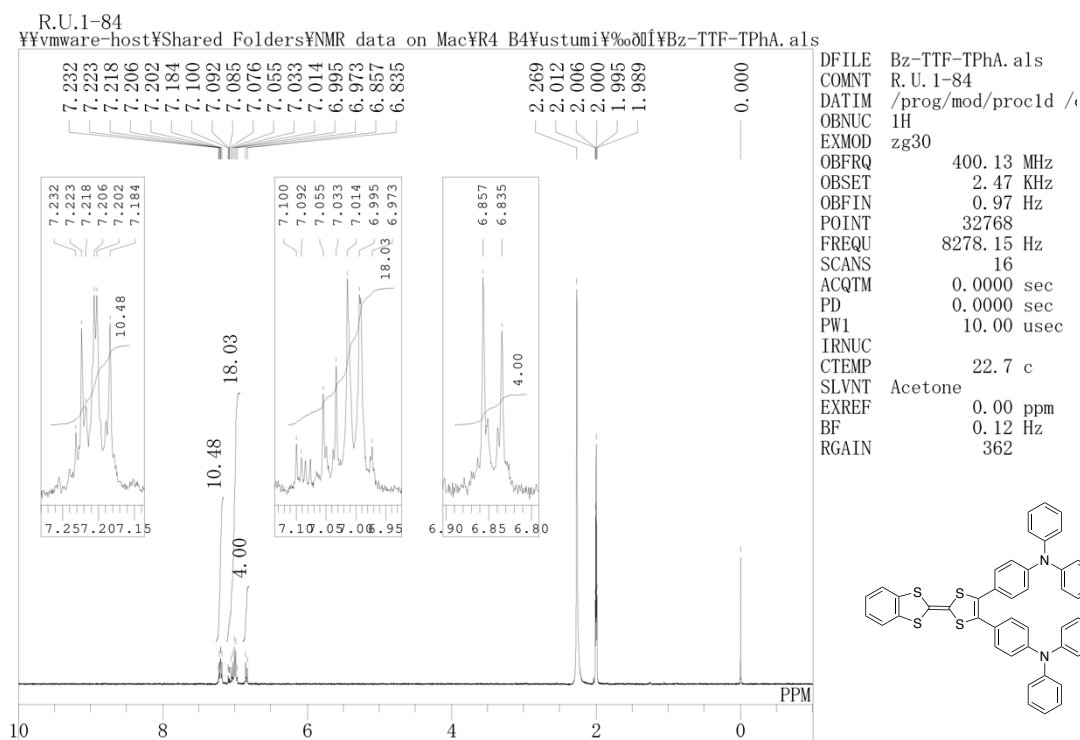

## 1 (<sup>13</sup>C NMR)

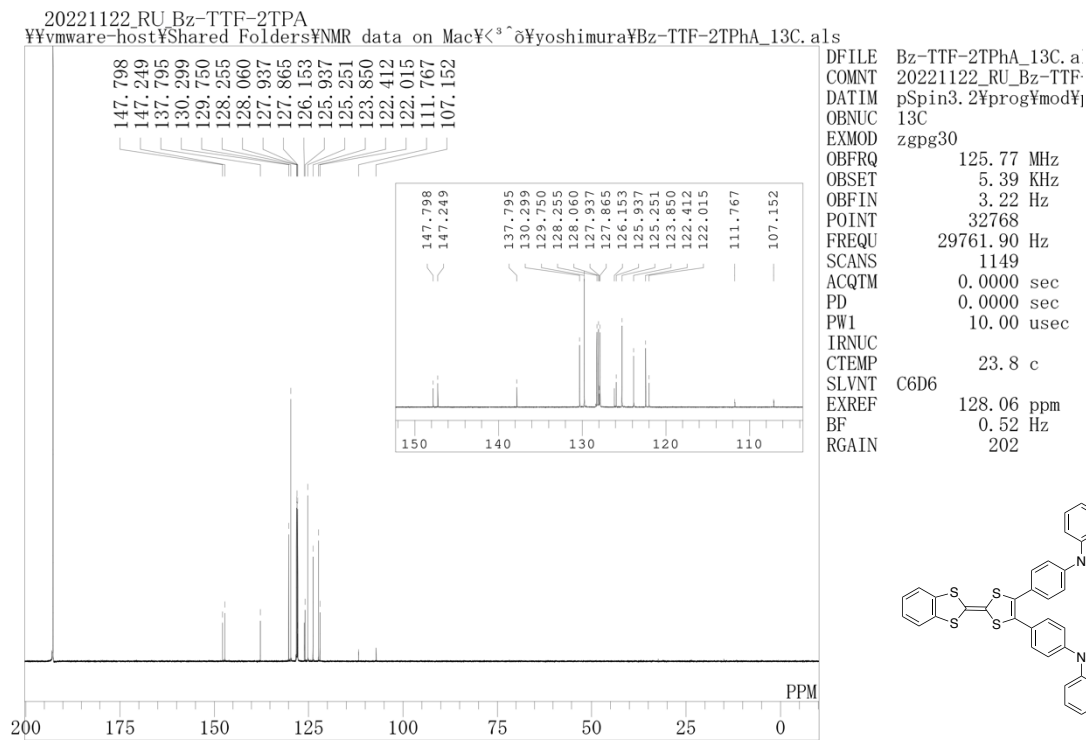

## 2 (<sup>1</sup>H NMR)

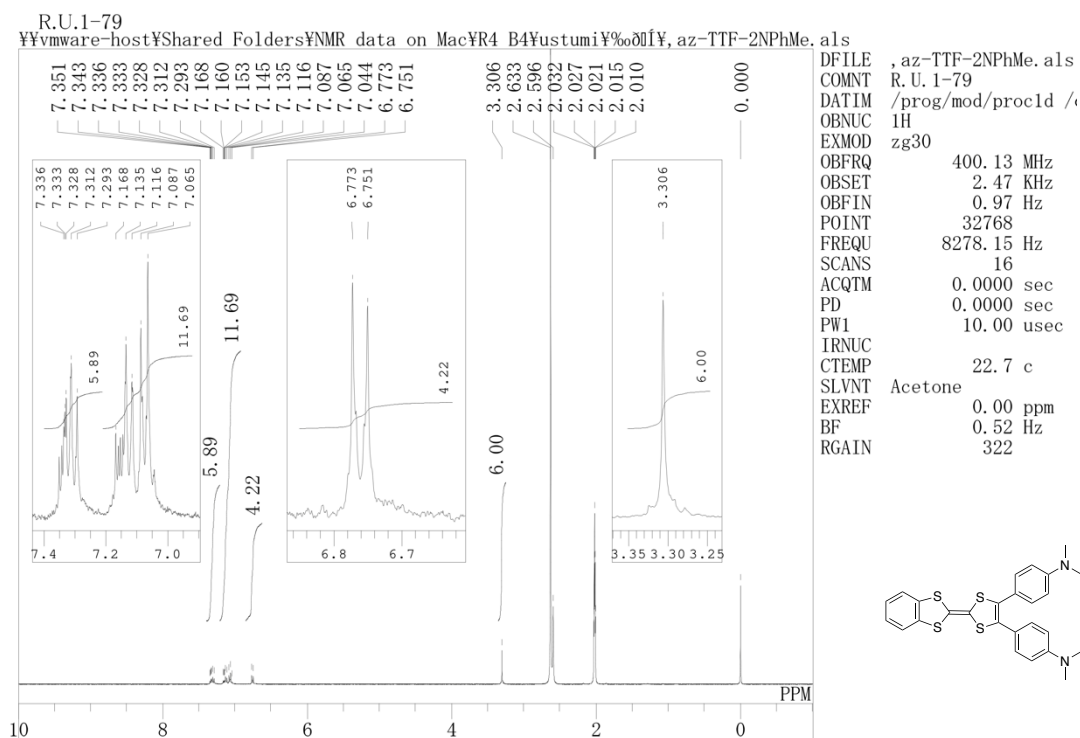

## References

- [1] *CrysAlisPro: Data Collection and Processing Software*, Rigaku Corporation, Toyko, Japan, 2015.
- [2] *SHELXT*: Sheldrick, G. M. *Acta Cryst.* 2015, **A71**, 3–8.
- [3] *SHELXL*: Sheldrick, G. M. *Acta Cryst.* 2015, **C71**, 3–8.
- [4] S. S. Bhojgude, T. Kaicharla and A. T. Biju, *Org. Lett.*, 2013, **15**, 5452.
